# Supplementary material
Source: publisher figshare collection journal article supplement (https://frontiersin.figshare.com/ndownloader/files/12256403)
Supplement: Supplementary file [file 12256403]

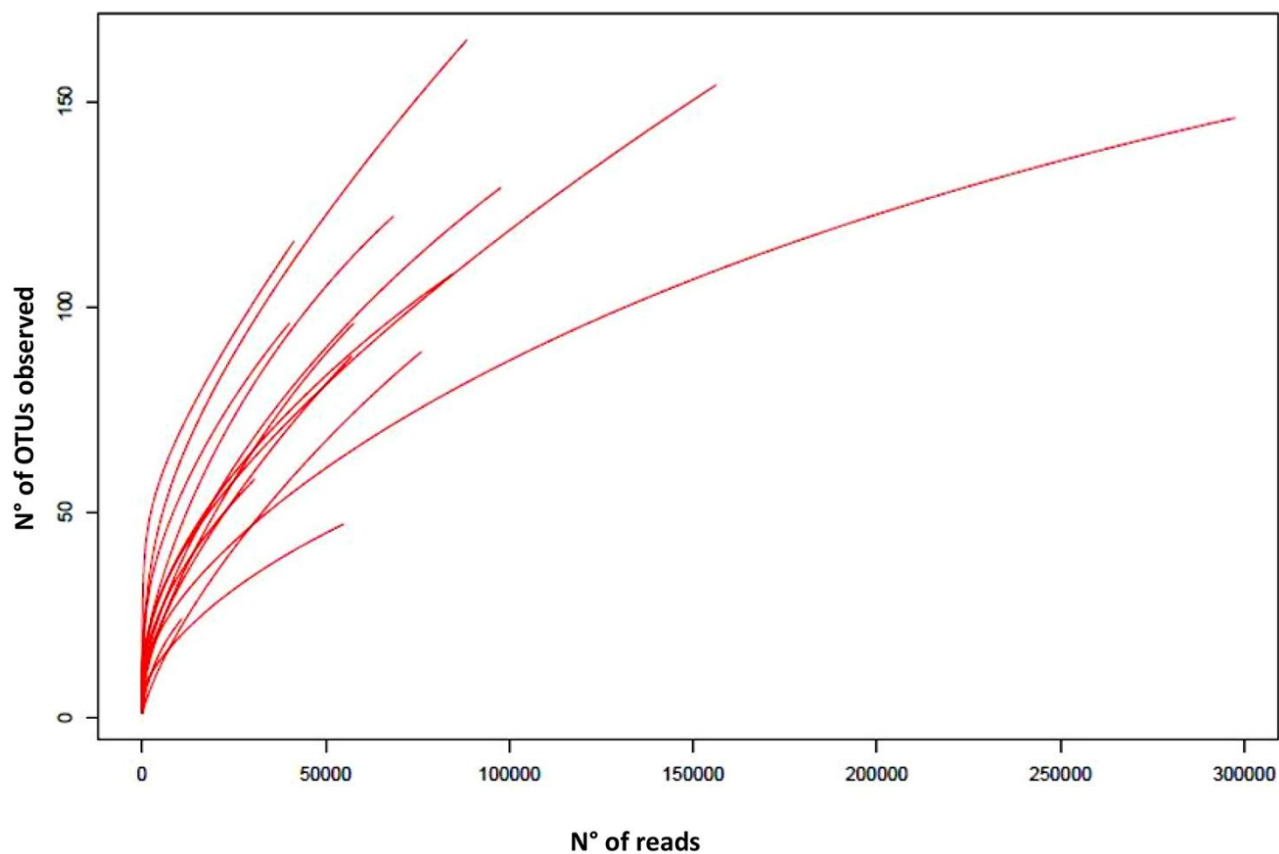

**Figure 1S.** The frequency of observed OTUs for each site was used to calculate fungal rarefaction curves using the 'rarecurve' function in the R library vegan.
